# Supplementary material for: Mental Health Disparities among Pre-Clinical Medical Students at Saint Louis University during the COVID-19 Pandemic
Source: MDPI journal article supplement (doi:10.3390/bs14020089), 2024-01-26
Supplement: s1 [file s1]

**Table S1.** Mental health characteristics among those at-risk for anxiety and depression, stratified by severity. Severe depression and anxiety were defined by a PHQ-9 score of 20 or greater, and a GAD-7 score of 15 or greater, respectively. URM = underrepresented in medicine. PHQ-9: Patient Health Questionnaire-9. GAD-7: Generalized Anxiety Disorder-7.

|                     | URM (n=7) | Non URM (n=29) |
|---------------------|-----------|----------------|
| Anxiety Severity    |           |                |
| Severe              | 2 (28.6%) | 5 (17.2%)      |
| Non-severe          | 5 (71.4%) | 24 (82.8%)     |
| Depression Severity |           |                |
| Severe              | 1 (14.3%) | 3 (10.3%)      |
| Non-severe          | 6 (85.7%) | 26 (89.7%)     |

**Table S2.** A. Multiple regression table of PHQ-9 scores with institutional concerns as predictors. B. Multiple regression table of GAD-7 scores with institutional concerns as predictors. PHQ-9: Patient Health Questionnaire-9. GAD-7: Generalized Anxiety Disorder-7. ANOVA = analysis of variance. B = unstandardized Beta coefficient. df = degrees of freedom. Sig. = significance.

| A. PHQ-9                                         |                |                |             |        |        |
|--------------------------------------------------|----------------|----------------|-------------|--------|--------|
| ANOVA                                            |                |                |             |        |        |
| Model                                            | Sum of squares | df             | Mean square | F      | Sig.   |
| Regression                                       | 727.163        | 5              | 145.433     | 5.965  | <0.001 |
| Residual                                         | 1974.768       | 81             | 24.380      |        |        |
| Total                                            | 2701.931       | 86             |             |        |        |
| Coefficients                                     |                |                |             |        |        |
| Model                                            | B              | Standard error | Beta        | t      | Sig.   |
| (Constant)                                       | 2.725          | 0.853          |             | 3.193  | 0.002  |
| Concern of lack of academic support              | -0.019         | 0.032          | -0.095      | -0.606 | 0.546  |
| Concern of lack of mental health support         | 0.059          | 0.031          | 0.285       | 1.862  | 0.066  |
| Concern of lack of financial support             | 0.044          | 0.019          | 0.251       | 2.362  | 0.021  |
| Concern of delayed medical training              | -0.020         | 0.035          | -0.081      | -0.562 | 0.575  |
| Concern of decreased quality of medical training | 0.065          | 0.030          | 0.314       | 2.142  | 0.035  |
| B. GAD-7                                         |                |                |             |        |        |
| ANOVA                                            |                |                |             |        |        |
| Model                                            | Sum of squares | df             | Mean square | F      | Sig.   |
| Regression                                       | 556.621        | 5              | 111.324     | 4.939  | <0.001 |
| Residual                                         | 1825.816       | 81             | 22.541      |        |        |
| Total                                            | 2382.437       | 86             |             |        |        |
| Coefficients                                     |                |                |             |        |        |
| Model                                            | B              | Standard error | Beta        | t      | Sig.   |
| (Constant)                                       | 3.096          | 0.821          |             | 3.773  | <0.001 |
| Concern of lack of academic support              | 0.020          | 0.031          | 0.104       | 0.647  | 0.520  |
| Concern of lack of mental health support         | 0.067          | 0.030          | 0.347       | 2.210  | 0.030  |
| Concern of lack of financial support             | 0.003          | 0.018          | 0.019       | 0.176  | 0.860  |
| Concern of delayed medical training              | -0.054         | 0.034          | -0.237      | -1.609 | 0.111  |
| Concern of decreased quality of medical training | 0.053          | 0.029          | 0.275       | 1.832  | 0.071  |

**Table S3.** A. Multiple regression table of PHQ-9 scores with pandemic-related concerns as predictors. B. Multiple regression table of GAD-7 scores with pandemic-related concerns as predictors. PHQ-9: Patient Health Questionnaire-9. GAD-7: Generalized Anxiety Disorder-7. ANOVA = analysis of variance. B = unstandardized Beta coefficient. df = degrees of freedom. Sig. = significance.

| <b>A. PHQ-9</b>                       |                       |                       |                    |          |             |
|---------------------------------------|-----------------------|-----------------------|--------------------|----------|-------------|
| <b>ANOVA</b>                          |                       |                       |                    |          |             |
| <b>Model</b>                          | <b>Sum of squares</b> | <b>df</b>             | <b>Mean square</b> | <b>F</b> | <b>Sig.</b> |
| Regression                            | 671.415               | 4                     | 167.854            | 6.779    | <0.001      |
| Residual                              | 2030.516              | 82                    | 24.762             |          |             |
| Total                                 | 2701.931              | 86                    |                    |          |             |
| <b>Coefficients</b>                   |                       |                       |                    |          |             |
| <b>Model</b>                          | <b>B</b>              | <b>Standard error</b> | <b>Beta</b>        | <b>t</b> | <b>Sig.</b> |
| (Constant)                            | 2.539                 | 1.209                 |                    | 2.101    | 0.039       |
| Concern of lack of social interaction | 0.044                 | 0.017                 | 0.255              | 2.517    | 0.014       |
| Concern of contracting COVID          | 0.018                 | 0.023                 | 0.105              | 0.807    | 0.422       |
| Concern of transmitting COVID         | -0.016                | 0.022                 | -0.098             | -0.737   | 0.463       |
| Concern of new financial difficulty   | 0.084                 | 0.022                 | 0.387              | 3.889    | <0.001      |
| <b>B. GAD-7</b>                       |                       |                       |                    |          |             |
| <b>ANOVA</b>                          |                       |                       |                    |          |             |
| <b>Model</b>                          | <b>Sum of squares</b> | <b>df</b>             | <b>Mean square</b> | <b>F</b> | <b>Sig.</b> |
| Regression                            | 287.016               | 4                     | 71.754             | 2.808    | 0.031       |
| Residual                              | 2095.420              | 82                    | 25.554             |          |             |
| Total                                 | 2382.437              | 86                    |                    |          |             |
| <b>Coefficients</b>                   |                       |                       |                    |          |             |
| <b>Model</b>                          | <b>B</b>              | <b>Standard error</b> | <b>Beta</b>        | <b>t</b> | <b>Sig.</b> |
| (Constant)                            | 2.795                 | 1.228                 |                    | 2.276    | 0.025       |
| Concern of lack of social interaction | 0.023                 | 0.018                 | 0.141              | 1.291    | 0.200       |
| Concern of contracting COVID          | 0.016                 | 0.023                 | 0.095              | 0.678    | 0.499       |
| Concern of transmitting COVID         | 0.007                 | 0.022                 | 0.043              | 0.300    | 0.765       |
| Concern of new financial difficulty   | 0.046                 | 0.022                 | 0.226              | 2.097    | 0.039       |

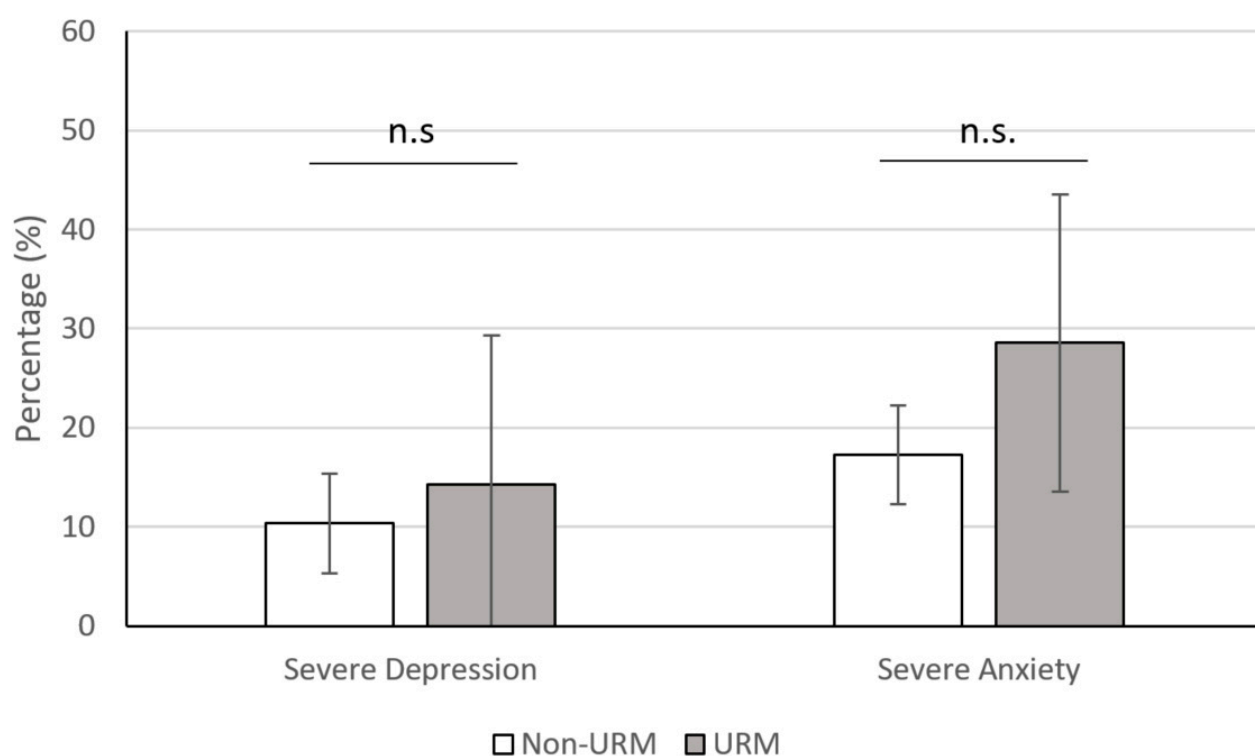

**Figure S1.** Left: Percentage of survey participants who were at-risk of depression that met criteria for severe depression based on PHQ-9 scores, with a threshold of 20. Right: Percentage of survey participants who were at-risk of anxiety that met criteria for severe anxiety based on GAD-7 scores, with a threshold of 15. Statistical significance was calculated via chi-squared analyses. Error bars indicate standard error. PHQ-9: Patient Health Questionnaire-9. GAD-7: Generalized Anxiety Disorder-7. URM = underrepresented in medicine. n.s. = not significant,  $p = 0.766$  (left),  $p = 0.497$  (right).
